# Supplementary material
Source: Research Square preprint supplement (doi:10.21203/rs.3.rs-9121791/v1)
Supplement: Supplementary file 1 [file b5cb1d2837dff79429f06b5a.docx]

**Table 1. Clinical data of the Patients.**

| **Characteristic** | **Overall**  N = 2,7911 | **test set**  N = 8361 | **training set**  N = 1,9551 | **p-value**2 |
| --- | --- | --- | --- | --- |
| Age(years) | 61.00 (52.00, 71.00) | 61.00 (51.00, 71.00) | 61.00 (52.00, 72.00) | 0.295 |
| Sex |  |  |  | 0.411 |
| Male | 1,865.00 (66.82%) | 568.00 (67.94%) | 1,297.00 (66.34%) |  |
| Female | 926.00 (33.18%) | 268.00 (32.06%) | 658.00 (33.66%) |  |
| Height(cm) | 164.00 (157.00, 170.00) | 164.00 (157.00, 170.00) | 164.00 (157.00, 170.00) | 0.304 |
| Body Weight (kg) | 62.00 (55.00, 73.00) | 62.00 (55.00, 74.80) | 62.00 (54.00, 72.50) | 0.186 |
| BMI (kg/m²) | 23.53 (20.76, 26.67) | 23.53 (20.98, 27.05) | 23.51 (20.76, 26.57) | 0.079 |
| Educational Attainment |  |  |  | 0.129 |
| Associate Degree | 608.00 (21.78%) | 202.00 (24.16%) | 406.00 (20.77%) |  |
| Mediate Education | 1,335.00 (47.83%) | 384.00 (45.93%) | 951.00 (48.64%) |  |
| Primary Education | 848.00 (30.38%) | 250.00 (29.90%) | 598.00 (30.59%) |  |
| Smoking History | 935.00 (33.50%) | 277.00 (33.13%) | 658.00 (33.66%) | 0.788 |
| Alcohol Use History | 777.00 (27.84%) | 234.00 (27.99%) | 543.00 (27.77%) | 0.907 |
| Shock | 13.00 (0.47%) | 4.00 (0.48%) | 9.00 (0.46%) | >0.999 |
| Hypothyroidism | 366.00 (13.11%) | 125.00 (14.95%) | 241.00 (12.33%) | 0.060 |
| Postoperative Status | 535.00 (19.17%) | 158.00 (18.90%) | 377.00 (19.28%) | 0.813 |
| Baseline Body Temperature (℃) | 36.60 (36.40, 36.80) | 36.60 (36.40, 36.90) | 36.60 (36.40, 36.80) | 0.265 |
| Consciousness Level |  |  |  | 0.564 |
| Alert and Oriented | 1,914.00 (68.60%) | 580.00 (69.38%) | 1,334.00 (68.27%) |  |
| Impaired Consciousness | 876.00 (31.40%) | 256.00 (30.62%) | 620.00 (31.73%) |  |
| SpO₂ (%) | 98.00 (97.00, 99.00) | 98.00 (97.00, 99.00) | 98.00 (97.00, 99.00) | 0.067 |
| RR (per minute) | 20.00 (17.00, 22.00) | 20.00 (17.00, 22.00) | 20.00 (18.00, 22.00) | 0.498 |
| Heart Rate | 89.00 (78.00, 101.00) | 89.00 (78.00, 101.00) | 89.00 (77.00, 101.00) | 0.730 |
| SBP (mmHg) | 126.00 (111.00, 144.00) | 126.00 (111.00, 143.00) | 127.00 (110.00, 144.00) | 0.685 |
| DBP (mmHg) | 70.00 (61.00, 81.00) | 70.00 (61.00, 81.00) | 70.00 (61.00, 81.00) | 0.885 |
| Mechanical Ventilation | 675.00 (26.74%) | 221.00 (29.00%) | 454.00 (25.77%) | 0.092 |
| Artificial Airway | 497.00 (19.69%) | 170.00 (22.31%) | 327.00 (18.56%) | 0.030 |
| Airway Humidification | 775.00 (30.71%) | 241.00 (31.63%) | 534.00 (30.31%) | 0.509 |
| HCO3- (mmol/L) | 22.90 (20.10, 25.60) | 23.10 (20.20, 25.65) | 22.90 (20.00, 25.50) | 0.206 |
| K+ (mmol/L) | 4.20 (3.80, 4.70) | 4.20 (3.80, 4.65) | 4.20 (3.80, 4.70) | >0.999 |
| CA2+ (mmol/L) | 1.12 (1.05, 1.17) | 1.12 (1.05, 1.18) | 1.12 (1.05, 1.17) | 0.788 |
| Lac(mmol/L) | 1.00 (0.70, 1.70) | 1.00 (0.70, 1.60) | 1.00 (0.70, 1.70) | 0.974 |
| Glu(mmol/L) | 8.30 (6.30, 11.20) | 8.10 (6.25, 11.00) | 8.40 (6.40, 11.30) | 0.403 |
| HGB (g/L) | 83.00 (70.00, 101.00) | 83.00 (70.00, 101.00) | 83.00 (70.00, 101.00) | 0.305 |
| PLT(×10⁹/L) | 132.00 (81.00, 197.00) | 127.50 (77.50, 193.00) | 134.00 (83.00, 198.00) | 0.065 |
| RBC ( ×10¹²/L) | 2.83 (2.36, 3.43) | 2.81 (2.36, 3.41) | 2.85 (2.37, 3.43) | 0.484 |
| Hct (%) | 25.90 (21.90, 31.30) | 25.70 (21.80, 31.10) | 26.00 (21.90, 31.30) | 0.305 |
| WBC (×10⁹/L) | 9.64 (6.68, 13.66) | 9.74 (6.65, 13.73) | 9.59 (6.70, 13.57) | 0.996 |
| CRP (mg/L) | 36.20 (15.40, 86.40) | 35.65 (15.65, 83.00) | 36.70 (15.40, 87.60) | 0.837 |
| Eos (×10⁹/L) | 0.07 (0.01, 0.18) | 0.06 (0.01, 0.18) | 0.07 (0.01, 0.18) | 0.751 |
| Eos% (%) | 0.70 (0.10, 2.20) | 0.60 (0.10, 2.20) | 0.70 (0.10, 2.30) | 0.550 |
| Neut (×10⁹/L) | 7.79 (5.05, 11.76) | 7.84 (5.03, 11.77) | 7.77 (5.06, 11.76) | 0.913 |
| Neut% (%) | 83.50 (75.10, 89.20) | 84.25 (75.25, 89.15) | 83.30 (75.00, 89.20) | 0.450 |
| Lymph (×10⁹/L) | 0.73 (0.47, 1.10) | 0.72 (0.46, 1.10) | 0.74 (0.47, 1.10) | 0.494 |
| Lymph% (%) | 7.70 (4.50, 13.40) | 7.70 (4.60, 13.10) | 7.80 (4.40, 13.50) | 0.848 |
| INR | 1.12 (1.01, 1.35) | 1.13 (1.01, 1.35) | 1.12 (1.00, 1.35) | 0.344 |
| PT (s) | 12.30 (11.00, 14.70) | 12.30 (11.10, 14.85) | 12.20 (11.00, 14.70) | 0.275 |
| APTT (s) | 33.00 (29.50, 37.50) | 33.00 (29.45, 37.60) | 33.00 (29.60, 37.50) | 0.632 |
| TT(s) | 15.60 (14.20, 17.50) | 15.70 (14.35, 17.80) | 15.60 (14.10, 17.30) | 0.064 |
| Fbg (g/L) | 3.57 (2.62, 4.47) | 3.52 (2.56, 4.53) | 3.58 (2.66, 4.47) | 0.635 |
| D2-F(μg/mL) | 1.42 (0.63, 3.18) | 1.52 (0.66, 3.20) | 1.38 (0.62, 3.18) | 0.282 |
| ALB(g/L) | 32.10 (28.60, 35.80) | 32.00 (28.80, 36.00) | 32.10 (28.50, 35.80) | 0.603 |
| PA (mg/dL) | 152.00 (100.00, 217.00) | 152.50 (99.00, 210.50) | 152.00 (100.00, 219.00) | 0.382 |
| ALB/GLB | 1.28 (1.03, 1.55) | 1.28 (1.04, 1.58) | 1.29 (1.02, 1.54) | 0.719 |
| TBIL (μmol/L) | 12.30 (7.70, 25.00) | 13.20 (7.90, 25.85) | 11.90 (7.60, 24.50) | 0.064 |
| DBIL (μmol/L) | 4.60 (2.30, 13.20) | 4.95 (2.30, 13.45) | 4.40 (2.30, 13.10) | 0.097 |
| ALT(U/L) | 18.20 (10.00, 41.00) | 17.95 (9.50, 39.60) | 18.40 (10.00, 42.00) | 0.400 |
| PCT-J(ng/mL) | 1.46 (0.51, 4.38) | 1.42 (0.51, 4.42) | 1.47 (0.51, 4.35) | 0.704 |
| CREA(μmol/L) | 407.30 (236.80, 625.50) | 407.15 (241.50, 616.10) | 407.40 (234.60, 630.00) | 0.643 |
| UA (μmol/L) | 368.00 (265.00, 497.00) | 363.50 (266.00, 495.00) | 370.00 (264.00, 497.00) | 0.643 |
| Predilution Replacement Fluid Flow Rate (ml/h) | 1,500.00 (1,500.00, 1,800.00) | 1,500.00 (1,500.00, 2,000.00) | 1,500.00 (1,500.00, 1,700.00) | 0.049 |
| Dialysate Flow Rate (ml/h) | 1,500.00 (1,500.00, 2,000.00) | 1,500.00 (1,500.00, 2,000.00) | 1,500.00 (1,500.00, 2,000.00) | 0.378 |
| Sodium Bicarbonate Infusion Rate (ml/h) | 150.00 (150.00, 200.00) | 150.00 (150.00, 200.00) | 150.00 (150.00, 200.00) | 0.354 |
| Blood Flow Rate (ml/min) | 180.00 (180.00, 180.00) | 180.00 (180.00, 180.00) | 180.00 (180.00, 180.00) | 0.113 |
| Ultrafiltration Rate (ml/h) | 300.00 (100.00, 400.00) | 300.00 (100.00, 400.00) | 300.00 (120.00, 400.00) | 0.335 |
| Total Volume of Predilution Replacement Fluid (ml) | 11,200.00 (8,820.00, 13,607.00) | 11,248.00 (8,843.50, 13,862.00) | 11,169.00 (8,810.00, 13,524.00) | 0.595 |
| Total Volume of Dialysate (ml) | 11,537.00 (9,651.00, 14,142.00) | 11,619.00 (9,582.00, 14,239.50) | 11,514.00 (9,681.00, 14,092.00) | 0.997 |
| Predilution Replacement Fluid Flow Rate (ml/h) | 1,156.00 (975.00, 1,421.00) | 1,161.50 (974.00, 1,423.00) | 1,154.00 (978.00, 1,420.00) | 0.876 |
| Total Effluent Volume (ml) | 25,796.00 (21,895.00, 30,803.00) | 25,797.00 (21,623.50, 30,904.50) | 25,796.00 (21,967.00, 30,794.00) | 0.852 |
| Treatment Duration (h) | 8.00 (6.42, 8.08) | 8.00 (6.50, 8.00) | 8.00 (6.33, 8.17) | 0.962 |
| Heater Temperature (℃) | 43.00 (41.00, 43.00) | 43.00 (41.00, 43.00) | 43.00 (41.00, 43.00) | 0.039 |
| Heating Method |  |  |  | 0.012 |
| Blood Line Warming | 2,261.00 (81.01%) | 701.00 (83.85%) | 1,560.00 (79.80%) |  |
| Replacement Fluid Warming | 530.00 (18.99%) | 135.00 (16.15%) | 395.00 (20.20%) |  |
| Anticoagulant Use | 1,628.00 (58.33%) | 465.00 (55.62%) | 1,163.00 (59.49%) | 0.058 |
| Vascular Access Type |  |  |  | 0.898 |
| Autogenous Arteriovenous Fistula | 397.00 (14.22%) | 120.00 (14.35%) | 277.00 (14.17%) |  |
| Central Venous Catheter | 2,394.00 (85.78%) | 716.00 (85.65%) | 1,678.00 (85.83%) |  |
| Room temperature (℃) | 26.00 (23.00, 26.00) | 26.00 (22.00, 26.00) | 26.00 (23.00, 26.00) | 0.171 |
| 1Median (Q1, Q3); n (%) | | | | |
| 2Wilcoxon rank sum test; Pearson's Chi-squared test; Fisher's exact test | | | | |

**Table 2. Comparison of clinical characteristics between the hypothermia and non-hypothermia groups in the training Set**

| **Characteristic** | **Overall**  N = 2,0391 | **Non-hypothermia**  N = 1,8761 | **Hypothermia**  N = 1631 | **p-value**2 |
| --- | --- | --- | --- | --- |
| Room temperature (℃) | 26.00 (23.00, 26.00) | 26.00 (24.00, 26.00) | 24.00 (22.00, 26.00) | <0.001 |
| Age(years) | 61.00 (52.00, 71.00) | 62.00 (52.00, 72.00) | 59.00 (47.00, 67.00) | 0.003 |
| Sex |  |  |  | 0.007 |
| Male | 1,357.00 (66.55%) | 1,233.00 (65.72%) | 124.00 (76.07%) |  |
| Female | 682.00 (33.45%) | 643.00 (34.28%) | 39.00 (23.93%) |  |
| Height (cm) | 164.00 (157.00, 170.00) | 164.00 (156.50, 170.00) | 166.00 (160.00, 171.00) | <0.001 |
| Body Weight(kg) | 62.00 (54.00, 72.50) | 61.00 (54.00, 72.00) | 68.00 (59.00, 76.00) | <0.001 |
| BMI (kg/m²) | 23.53 (20.76, 26.61) | 23.44 (20.76, 26.57) | 24.61 (22.28, 27.34) | <0.001 |
| Educational Attainment |  |  |  | 0.011 |
| Associate Degree | 434.00 (21.28%) | 388.00 (20.68%) | 46.00 (28.22%) |  |
| Mediate Education | 982.00 (48.16%) | 900.00 (47.97%) | 82.00 (50.31%) |  |
| Primary Education | 623.00 (30.55%) | 588.00 (31.34%) | 35.00 (21.47%) |  |
| Smoking History |  |  |  | 0.025 |
| No | 1,351.00 (66.26%) | 1,256.00 (66.95%) | 95.00 (58.28%) |  |
| Yes | 688.00 (33.74%) | 620.00 (33.05%) | 68.00 (41.72%) |  |
| Alcohol Use History |  |  |  | <0.001 |
| No | 1,471.00 (72.14%) | 1,373.00 (73.19%) | 98.00 (60.12%) |  |
| Yes | 568.00 (27.86%) | 503.00 (26.81%) | 65.00 (39.88%) |  |
| Artificial Airway |  |  |  | <0.001 |
| No | 1,482.00 (80.76%) | 1,384.00 (82.78%) | 98.00 (60.12%) |  |
| Yes | 353.00 (19.24%) | 288.00 (17.22%) | 65.00 (39.88%) |  |
| Airway Humidification |  |  |  | <0.001 |
| No | 1,267.00 (69.05%) | 1,204.00 (72.01%) | 63.00 (38.65%) |  |
| Yes | 568.00 (30.95%) | 468.00 (27.99%) | 100.00 (61.35%) |  |
| Mechanical Ventilation |  |  |  | <0.001 |
| No | 1,348.00 (73.46%) | 1,272.00 (76.08%) | 76.00 (46.63%) |  |
| Yes | 487.00 (26.54%) | 400.00 (23.92%) | 87.00 (53.37%) |  |
| Shock |  |  |  | 0.566 |
| No | 2,029.00 (99.51%) | 1,867.00 (99.52%) | 162.00 (99.39%) |  |
| Yes | 10.00 (0.49%) | 9.00 (0.48%) | 1.00 (0.61%) |  |
| Hypothyroidism |  |  |  | <0.001 |
| No | 1,786.00 (87.59%) | 1,661.00 (88.54%) | 125.00 (76.69%) |  |
| Yes | 253.00 (12.41%) | 215.00 (11.46%) | 38.00 (23.31%) |  |
| Postoperative Status |  |  |  | 0.003 |
| No | 1,646.00 (80.73%) | 1,529.00 (81.50%) | 117.00 (71.78%) |  |
| Yes | 393.00 (19.27%) | 347.00 (18.50%) | 46.00 (28.22%) |  |
| Consciousness Level |  |  |  | <0.001 |
| Alert and Oriented | 1,386.00 (68.01%) | 1,333.00 (71.09%) | 53.00 (32.52%) |  |
| Impaired Consciousness | 652.00 (31.99%) | 542.00 (28.91%) | 110.00 (67.48%) |  |
| SpO₂ (%) | 98.00 (97.00, 99.00) | 98.00 (97.00, 99.00) | 98.00 (97.00, 100.00) | 0.016 |
| RR( per minute) | 20.00 (18.00, 22.00) | 20.00 (17.00, 22.00) | 21.00 (18.00, 25.00) | <0.001 |
| Heart Rate | 89.00 (77.00, 101.00) | 88.00 (77.00, 100.00) | 105.00 (87.00, 118.00) | <0.001 |
| HCO3- (mmol/L) | 22.90 (20.00, 25.60) | 22.90 (20.00, 25.60) | 22.40 (19.60, 25.70) | 0.451 |
| K+ (mmol/L) | 4.20 (3.80, 4.70) | 4.20 (3.80, 4.70) | 4.10 (3.70, 4.60) | 0.042 |
| CA2+ (mmol/L) | 1.12 (1.05, 1.17) | 1.12 (1.05, 1.17) | 1.12 (1.04, 1.19) | 0.487 |
| Lac(mmol/L) | 1.00 (0.70, 1.70) | 1.00 (0.70, 1.60) | 1.50 (1.00, 3.00) | <0.001 |
| Hct (%) | 26.00 (22.00, 32.00) | 26.00 (22.00, 32.00) | 26.00 (21.20, 31.00) | 0.283 |
| Glu(mmol/L) | 8.40 (6.40, 11.30) | 8.30 (6.40, 11.30) | 8.70 (6.60, 11.50) | 0.118 |
| HGB (g/L) | 83.00 (70.00, 101.00) | 83.00 (70.00, 101.00) | 90.00 (71.00, 103.00) | 0.178 |
| PLT (×10⁹/L) | 133.00 (82.00, 197.00) | 134.00 (82.00, 197.00) | 115.00 (74.00, 187.00) | 0.208 |
| RBC ( ×10¹²/L) | 2.85 (2.36, 3.43) | 2.83 (2.36, 3.43) | 3.03 (2.44, 3.48) | 0.248 |
| Hct (%) | 26.00 (21.90, 31.30) | 25.95 (21.90, 31.20) | 27.60 (22.00, 31.60) | 0.315 |
| WBC (×10⁹/L) | 9.56 (6.66, 13.55) | 9.39 (6.55, 13.30) | 12.03 (8.11, 17.94) | <0.001 |
| CRP(mg/L) | 37.70 (15.40, 87.90) | 34.25 (14.80, 80.90) | 82.00 (39.80, 139.50) | <0.001 |
| Eos (×10⁹/L) | 0.07 (0.01, 0.18) | 0.07 (0.01, 0.18) | 0.02 (0.00, 0.11) | <0.001 |
| Eos% (%) | 0.70 (0.10, 2.30) | 0.80 (0.10, 2.30) | 0.20 (0.00, 1.20) | <0.001 |
| Neut (×10⁹/L) | 7.72 (5.01, 11.76) | 7.58 (4.93, 11.32) | 10.78 (7.24, 16.27) | <0.001 |
| Neut% (%) | 83.30 (74.90, 89.40) | 82.80 (74.30, 88.90) | 88.40 (83.30, 92.60) | <0.001 |
| Lymph (×10⁹/L) | 0.74 (0.47, 1.10) | 0.75 (0.48, 1.11) | 0.63 (0.38, 0.92) | <0.001 |
| Lymph% (%) | 7.80 (4.40, 13.60) | 8.00 (4.60, 13.90) | 5.40 (3.10, 9.10) | <0.001 |
| INR | 1.12 (1.00, 1.35) | 1.11 (1.00, 1.33) | 1.26 (1.07, 1.52) | <0.001 |
| PT (s) | 12.20 (11.00, 14.70) | 12.20 (11.00, 14.50) | 13.50 (11.90, 16.50) | <0.001 |
| APTT (s) | 33.00 (29.60, 37.70) | 32.90 (29.50, 37.40) | 34.10 (30.80, 40.70) | <0.001 |
| TT(s) | 15.60 (14.20, 17.40) | 15.60 (14.20, 17.40) | 15.40 (14.00, 17.40) | 0.304 |
| Fbg (g/L) | 3.58 (2.65, 4.47) | 3.57 (2.66, 4.41) | 3.65 (2.63, 4.89) | 0.111 |
| D2-F (μg/mL) | 1.38 (0.62, 3.15) | 1.34 (0.61, 3.10) | 2.31 (0.91, 3.50) | <0.001 |
| ALB (g/L) | 32.20 (28.60, 35.80) | 32.20 (28.55, 35.80) | 31.60 (28.70, 35.40) | 0.367 |
| PA (mg/dL) | 152.00 (100.00, 219.00) | 156.00 (103.00, 222.00) | 116.00 (77.00, 165.00) | <0.001 |
| ALB/GLB | 1.30 (1.03, 1.56) | 1.30 (1.04, 1.55) | 1.25 (1.00, 1.60) | 0.962 |
| TBIL (μmol/L ) | 12.00 (7.60, 24.50) | 11.50 (7.50, 22.70) | 21.20 (11.10, 42.40) | <0.001 |
| DBIL(μmol/L ) | 4.40 (2.30, 13.20) | 4.20 (2.20, 12.15) | 10.10 (4.60, 26.50) | <0.001 |
| ALT (U/L) | 18.40 (10.00, 42.00) | 18.00 (10.00, 40.00) | 30.00 (14.50, 64.80) | <0.001 |
| PCT-J (ng/mL) | 1.47 (0.51, 4.41) | 1.35 (0.47, 4.02) | 3.04 (1.24, 10.58) | <0.001 |
| CREA (μmol/L) | 407.00 (231.00, 629.00) | 423.35 (248.25, 643.30) | 240.30 (150.00, 411.00) | <0.001 |
| UA (μmol/L) | 370.00 (264.00, 498.00) | 370.00 (269.00, 496.50) | 368.00 (211.00, 510.00) | 0.252 |
| Treatment Duration (h) | 8.00 (6.42, 8.17) | 8.00 (6.17, 8.00) | 8.83 (7.75, 12.00) | <0.001 |
| Heater Temperature (℃) | 43.00 (41.00, 43.00) | 43.00 (41.00, 43.00) | 42.00 (38.00, 43.00) | <0.001 |
| Predilution Replacement Fluid Flow Rate(ml/h) | 1,500.00 (1,500.00, 1,700.00) | 1,500.00 (1,500.00, 1,800.00) | 1,500.00 (1,500.00, 1,700.00) | 0.327 |
| Dialysate Flow Rate (ml/h) | 1,500.00 (1,500.00, 2,000.00) | 1,500.00 (1,500.00, 2,000.00) | 1,500.00 (1,500.00, 1,500.00) | 0.001 |
| Sodium Bicarbonate Infusion Rate (ml/h) | 150.00 (150.00, 200.00) | 150.00 (150.00, 200.00) | 150.00 (150.00, 200.00) | 0.190 |
| Heating Method |  |  |  | 0.033 |
| Blood Line Warming | 1,633.00 (80.09%) | 1,492.00 (79.53%) | 141.00 (86.50%) |  |
| Replacement Fluid Warming | 406.00 (19.91%) | 384.00 (20.47%) | 22.00 (13.50%) |  |
| Blood Flow Rate (ml/min) | 180.00 (180.00, 180.00) | 180.00 (180.00, 180.00) | 180.00 (180.00, 180.00) | 0.574 |
| Ultrafiltration Rate (ml/h) | 300.00 (100.00, 400.00) | 300.00 (150.00, 400.00) | 200.00 (50.00, 350.00) | <0.001 |
| Total Volume of Predilution Replacement Fluid(ml) | 11,200.00 (8,848.00, 13,547.00) | 11,097.00 (8,750.50, 13,302.00) | 12,317.00 (10,225.00, 21,877.00) | <0.001 |
| Total Volume of Dialysate(ml) | 11,518.00 (9,720.00, 14,142.00) | 11,482.00 (9,619.50, 13,879.00) | 12,930.00 (10,753.00, 21,776.00) | <0.001 |
| Predilution Replacement Fluid Flow Rate(ml/h) | 1,155.00 (979.00, 1,428.00) | 1,150.00 (965.00, 1,394.50) | 1,357.00 (1,097.00, 2,150.00) | <0.001 |
| Total Effluent Volume(ml) | 25,847.00 (22,021.00, 30,840.00) | 25,661.00 (21,863.00, 30,269.00) | 28,125.00 (24,046.00, 45,218.00) | <0.001 |
| Anticoagulant Use |  |  |  | <0.001 |
| No | 840.00 (41.20%) | 753.00 (40.14%) | 87.00 (53.37%) |  |
| Yes | 1,199.00 (58.80%) | 1,123.00 (59.86%) | 76.00 (46.63%) |  |
| Total Net Ultrafiltration Volume(ml) | 2,245.00 (1,442.00, 2,910.00) | 2,240.00 (1,486.00, 2,893.50) | 2,253.00 (1,277.00, 3,183.00) | 0.459 |
| Vascular Access Type |  |  |  | <0.001 |
| Autogenous Arteriovenous Fistula | 287.00 (14.08%) | 280.00 (14.93%) | 7.00 (4.29%) |  |
| Central Venous Catheter | 1,752.00 (85.92%) | 1,596.00 (85.07%) | 156.00 (95.71%) |  |
| Baseline Body Temperature (℃) | 36.50 (36.40, 36.80) | 36.50 (36.30, 36.80) | 37.60 (37.10, 38.20) | <0.001 |
| SBP (mmHg) | 126.00 (110.00, 144.00) | 127.00 (111.00, 145.00) | 118.00 (105.00, 137.00) | <0.001 |
| DBP (mmHg) | 70.00 (60.00, 81.00) | 70.00 (61.00, 81.00) | 67.00 (57.00, 76.00) | 0.004 |
| 1Median (Q1, Q3); n (%) | | | | |
| 2Wilcoxon rank sum test; Pearson's Chi-squared test; Fisher's exact test | | | | |

**Table 3. Multivariate logistics analyses on variables for the prediction of** **hypothermia of patients in the test set.**

| **Characteristic** | **OR** | **95% CI** | **p-value** |
| --- | --- | --- | --- |
| LAC | 1.18 | 1.11, 1.25 | <0.001 |
| CRP | 1.00 | 1.00, 1.01 | 0.07 |
| Treatment Duration | 1.02 | 1.01, 1.02 | <0.001 |
| Baseline Temperature | 9.81 | 7.29, 13.40 | <0.001 |
| Abbreviations: CI = Confidence Interval, OR = Odds Ratio | | | |
